# Supplementary material for: The Impact of Non-pharmaceutical Interventions on COVID-19 in Workers and Residents of Nursing Homes in Geneva: A Mixed-Methods Study
Source: Preprints.org preprint supplement (doi:10.20944/preprints202401.2086.v1), 2024-01-30
Supplement: Supplementary file 2 [file supplementary]

**Supplemental Material**

**The impact of non-pharmaceutical interventions on COVID-19 in workers and residents of nursing homes in Geneva: a mixed-methods study**

Lakshmi Krishna Menon, Ania Wisniak, Simon Regard, Silvia Stringhini, Idris Guessous, Jean-François Balavoine, Omar Kherad, and The SEROCoV-WORK + Study Group: Victoria Alber, Isabelle Arm‐Vernez, Donatien Bachmann, Stéphanie Baggio, Gil Barbosa Monteiro, Hélène Baysson, Patrick Bleich, Isabelle Boissel, Prune Collombet, Philippine Couson, Alioucha Davidovic, Clement Deiri, Divina Del Rio, Carlos de Mestral, David De Ridder, Yaron Dibner, Paola D’ippolito, Joséphine Duc, Roxane Dumont, Isabella Eckerle, Nacira El Merjani, Gwennaelle Ferniot, Antoine Flahault, Natalie Francioli, Marion Frangville, Carine Garande, Laurent Gétaz, Pamela Giraldo, Fanny Golaz, Julie Guérin, Ludivine Haboury, Séverine Harnal, Victoria Javet, Amélie Laboulais, Gaëlle Lamour, Xavier Lefebvre, Pierre Lescuyer, Andrea Jutta Loizeau, Fanny‐Blanche Lombard, Elsa Lorthe, Chantal Martinez, Kourosh Massiha, Ludovic Metral‐Boffod, Benjamin Meyer, Khaled Mostaguir, Mayssam Nehme, Natacha Noël, Nicolas Oederlin, Francesco Pennacchio, Javier Perez‐Saez, Dusan Petrovic, Attilio Picazio, Jane Portier, Géraldine Poulain, Caroline Pugin, Barinjaka Rakotomiaramanana, Zo Francia Randrianandrasana, Aude Richard, Viviane Richard, Sabina Rodriguez‐Velazquez, Lilas Salzmann‐Bellard, Leonard Thorens, Simon Torroni, David Vidonne, Guillemette Violot, Nicolas Vuilleumier, Zoé Waldmann, Manon Will, Sabine Yerly
